# Supplementary material
Source: PubMed Central journal article supplement (PMC2593380)

FIG. S1.

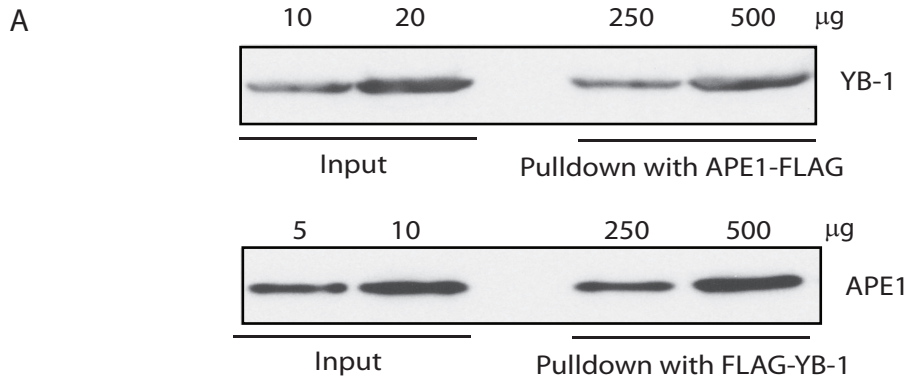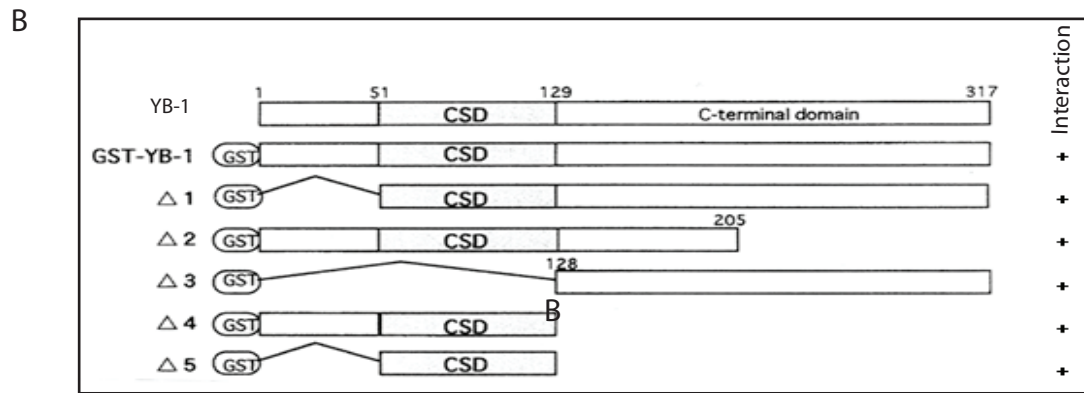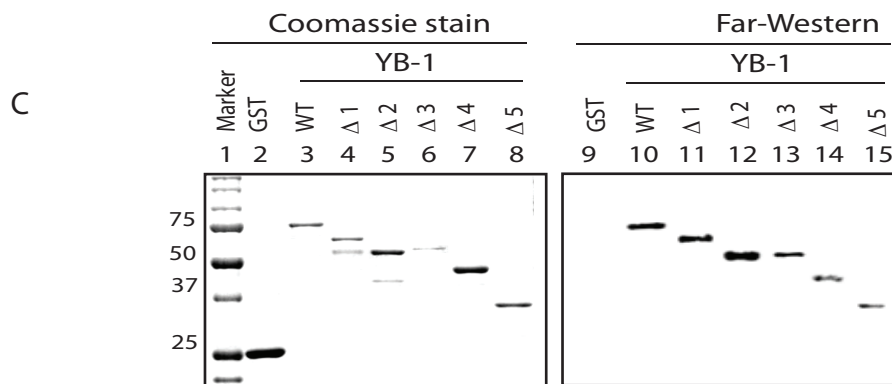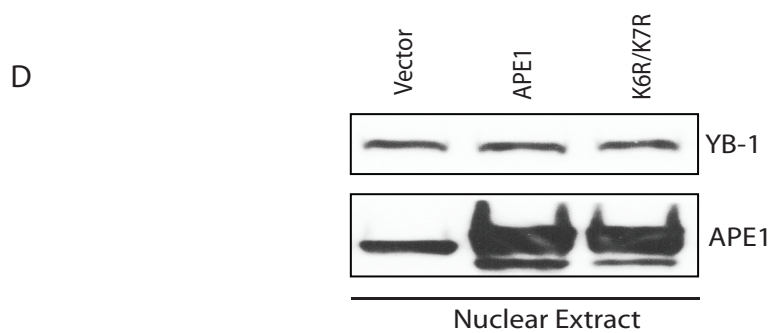

Supplement: supp_28_23_7066__1.pdf [file supp_28_23_7066__1.pdf]
